# Supplementary material
Source: PubMed Central journal article supplement (PMC2676937)
Supplement: NIHMS96656-supplement-pdf.pdf [file NIHMS96656-supplement-pdf.pdf]

## Supporting Information

The orbital ground state of the azide-substrate complex of human heme oxygenase is an indicator of distal H-bonding: Implications for the enzyme mechanism

*Hiroshi Ogura<sup>†</sup>, John P. Evans<sup>§</sup>, Dungeng Peng<sup>†</sup>, James D. Satterlee<sup>#</sup>, Paul R. Ortiz de Montellano<sup>§</sup> and Gerd N. La Mar<sup>†\*</sup>*

Contains 6 Figures and 1 Table. Total pages 7.

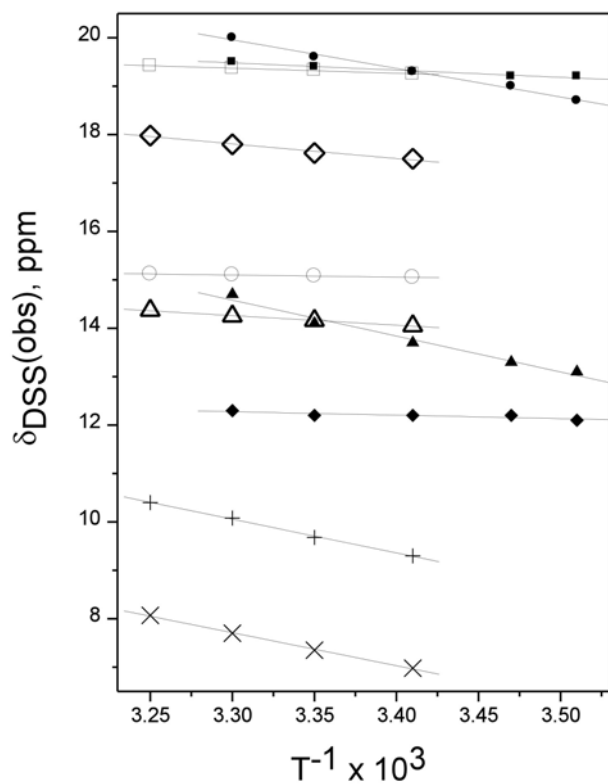

**Figure S1.** Curie plots (observed chemical shifts versus reciprocal absolute temperature) of the six DMDH methyls of hHO-DMDH-N<sub>3</sub> (closed markers for resolved methyls, and x and + symbols for unresolved methyls), and D140A-hHO-DMDH-N<sub>3</sub> (open markers), in <sup>2</sup>H<sub>2</sub>O, 100 mM phosphate, pH 7.1

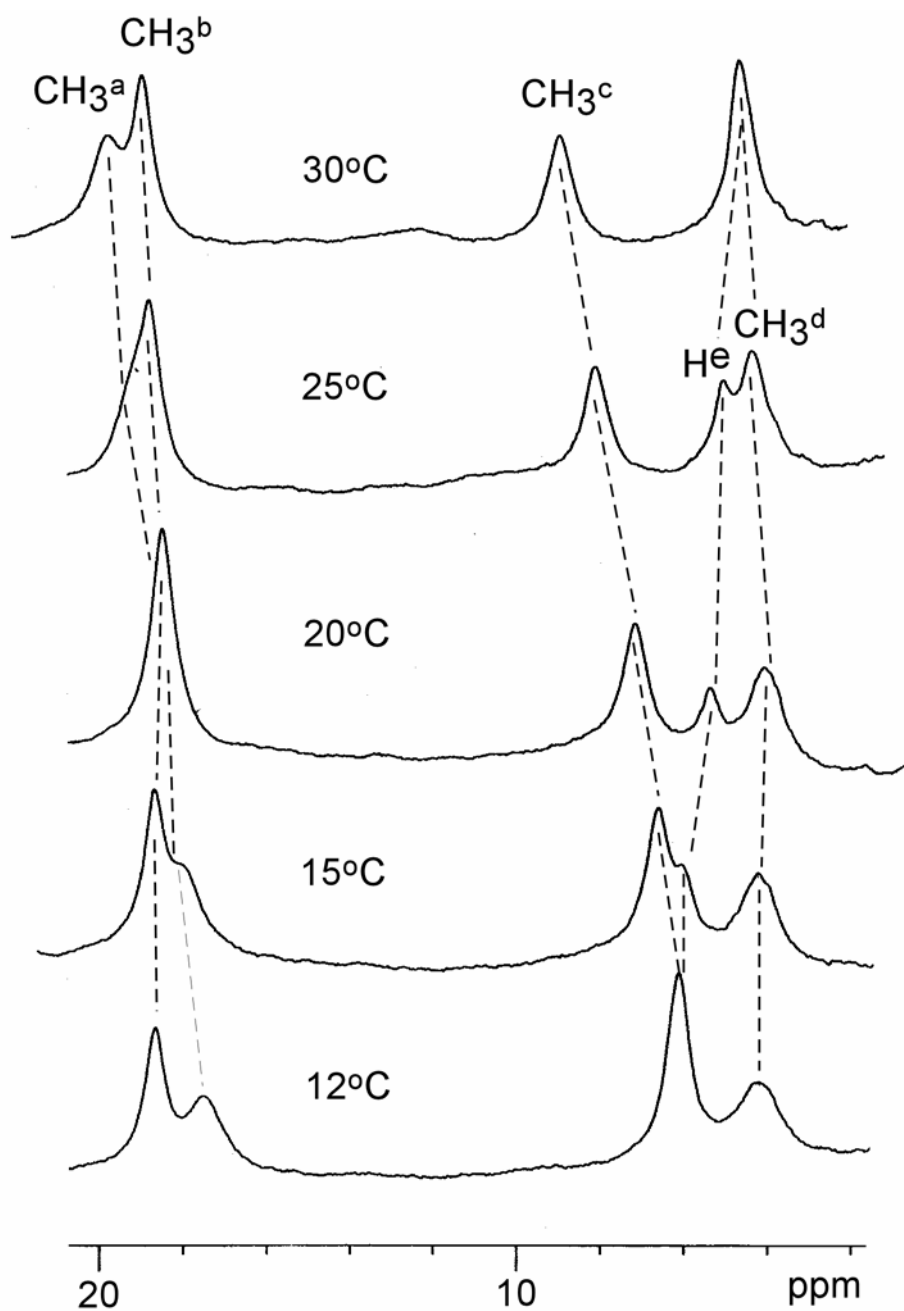

**Figure S2.** Low-field 600 MHz, <sup>1</sup>H NMR spectral window for the resolved DMDH methyls for D140A-hHO-DMDH-N<sub>3</sub> in <sup>2</sup>H<sub>2</sub>O, 100 mM phosphate, pH 7.1 as a function of temperatures that allows the resolution of each methyl peak.

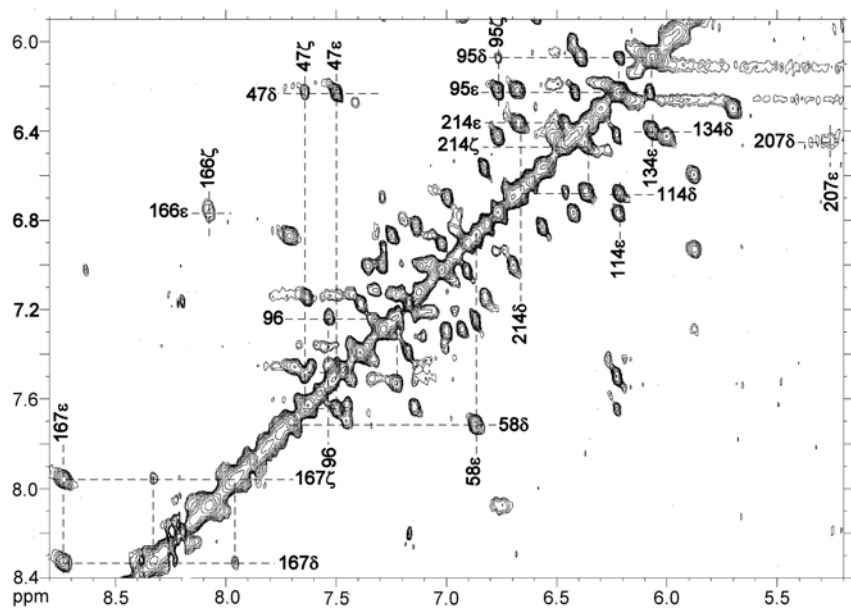

**Figure S3.** Portion of the 500 MHz  $^1\text{H}$  NMR TOCSY spectrum (mixing time 20 ms, repetition rate  $1.3\text{ s}^{-1}$ ) of hHO-DMDH- $\text{N}_3$  in  $^2\text{H}_2\text{O}$ , 100 mM phosphate, pH 7.1, at  $30^\circ\text{C}$  illustrating the scalar contacts within aromatic residues. Cross peaks are labeled by residue number and ring position.

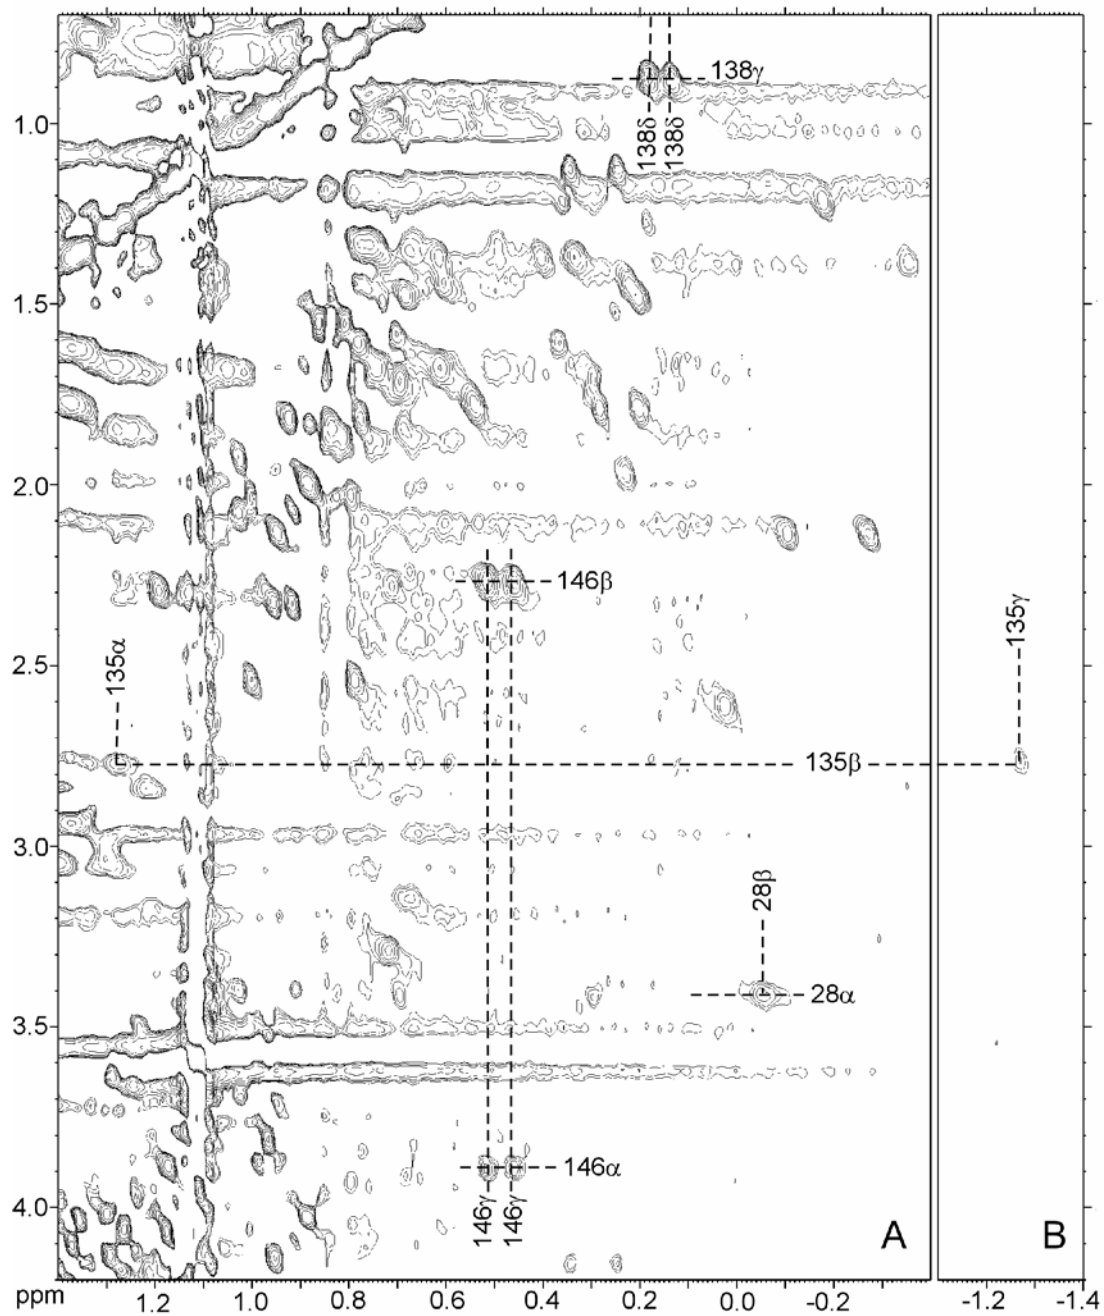

**Figure S4.** Portions of the 600 MHz  $^1\text{H}$  NMR TOCSY spectrum (mixing time 20 ms, repetition rate  $1.4\text{ s}^{-1}$ ) illustrating the scalar contacts within key aliphatic residues of the active site; Ala28, Ile57, Leu138, Thr135, and Val146.

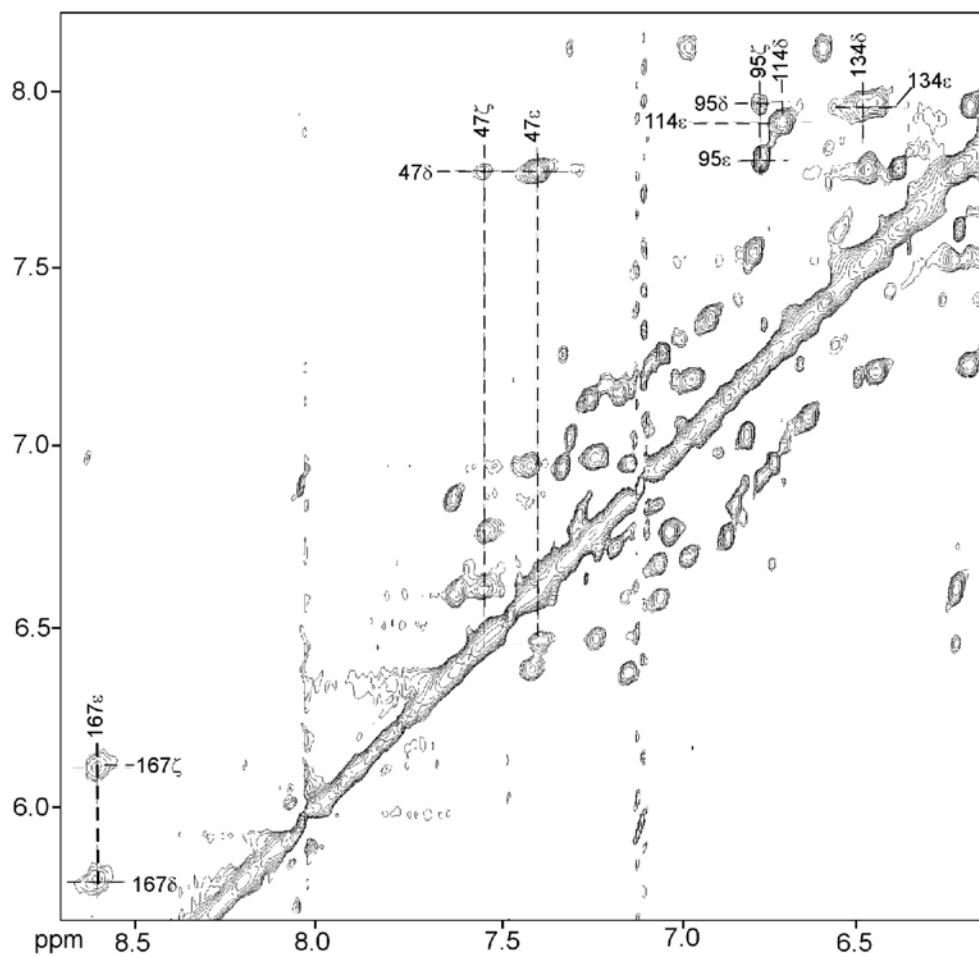

**Figure S5.** Portion of the 500 MHz  $^1\text{H}$  NMR TOCSY spectrum (mixing time 50 ms, repetition rate  $1.4\text{ s}^{-1}$ ) of D140A-hHO-DMDH- $\text{N}_3$  in  $^2\text{H}_2\text{O}$ , 100 mM in phosphate, pH 7.1 at  $30^\circ\text{C}$ , illustrating scalar connection within aromatic rings.

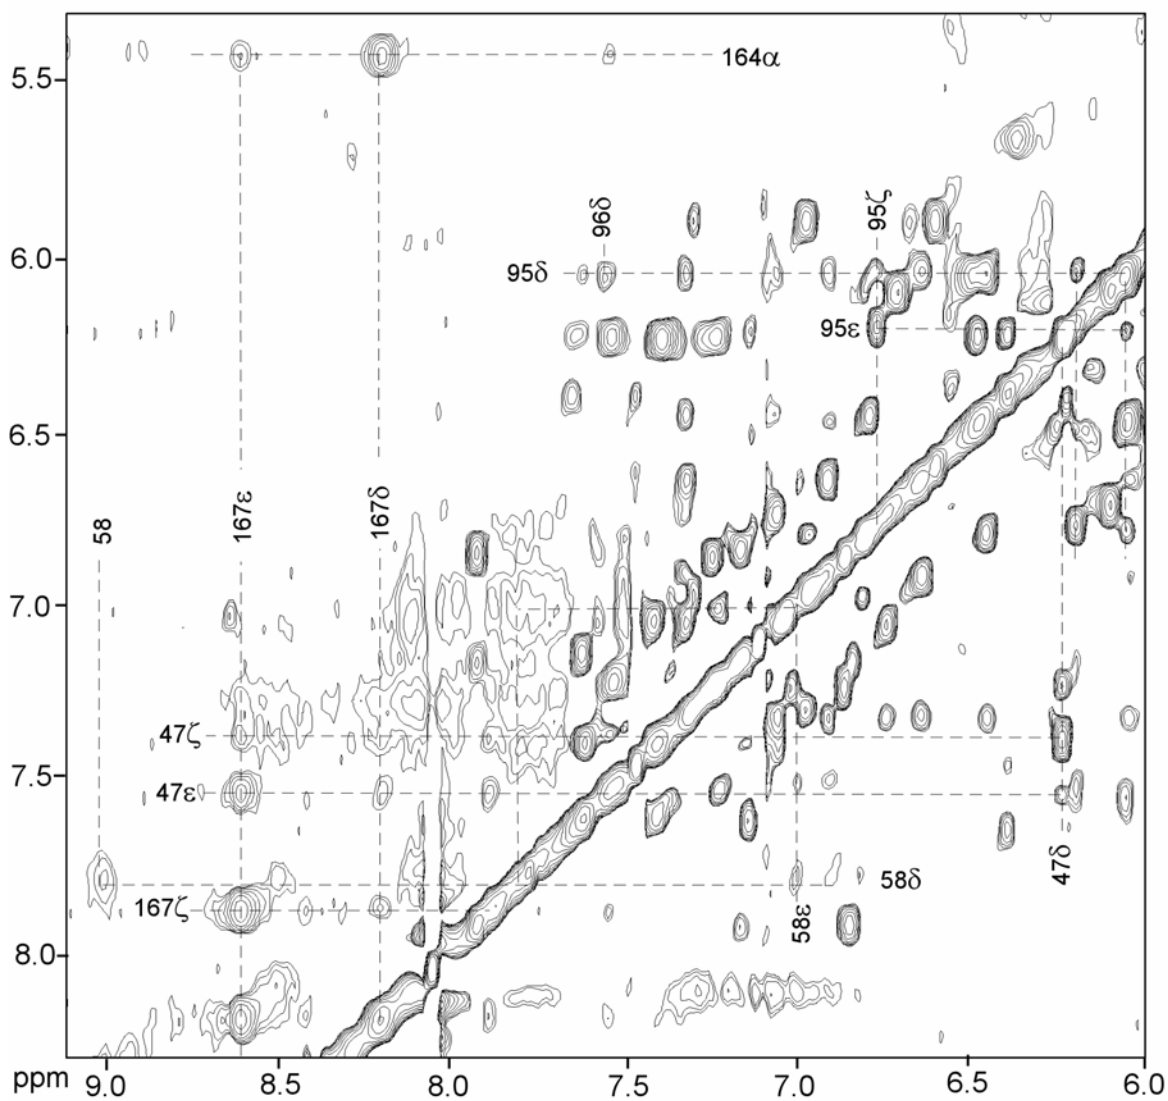

**Figure S6.** Portion of the 600 MHz  $^1\text{H}$  NMR NOESY spectrum (mixing time 40 ms; repetition rate  $1.5\text{ s}^{-1}$ ) of D140A-hHO-DMDH- $\text{N}_3$  in  $^2\text{H}_2\text{O}$ , 100 mM in phosphate, pH 7.0 at  $30^\circ\text{C}$  illustrating the conserved contacts among the aromatic residues in the distal pocket.

**Table S1.** Chemical shifts for the distal aromatic cluster residues in DMDH-azide complexes of WT hHO and D140A-hHO

| Residue | Proton                         | WT hHO             |                      | D140A-hHO          |
|---------|--------------------------------|--------------------|----------------------|--------------------|
|         |                                | Azide <sup>a</sup> | Cyanide <sup>b</sup> | Azide <sup>a</sup> |
| Phe47   | C <sub>δ</sub> Hs              | 6.22               | 6.23                 | 6.22               |
|         | C <sub>ε</sub> Hs              | 7.49               | 7.45                 | 7.41               |
|         | C <sub>ζ</sub> H               | 7.63               | 7.57                 | 7.50               |
| Tyr58   | C <sub>δ</sub> Hs              | 7.68               | 7.16                 | 7.79               |
|         | C <sub>ε</sub> Hs              | 6.85               | 6.97                 | 6.98               |
| Phe95   | C <sub>δ</sub> Hs              | 6.07               | 6.02                 | 6.07               |
|         | C <sub>ε</sub> Hs              | 6.26               | 6.16                 | 6.20               |
|         | C <sub>ζ</sub> H               | 6.75               | 6.70                 | 6.72               |
| Trp96   | N <sub>ε</sub> H               | 11.70              | 11.71                |                    |
|         | C <sub>δ1</sub> H              | 7.53               | 7.52                 |                    |
|         | C <sub>ζ2</sub> H              | 7.58               | 7.48                 |                    |
| Leu138  | C <sub>α</sub> H               | 3.76               | 3.12                 | -                  |
|         | C <sub>β</sub> Hs              | -0.35, 0.47        | -0.40, 0.55          | -                  |
|         | C <sub>δ</sub> H               | 0.48               | 0.55                 | -                  |
| Leu164  | C <sub>α</sub> H               | 5.47               | 5.38                 | 5.40               |
|         | C <sub>δ2</sub> H <sub>3</sub> | 1.34               | 0.93                 | 1.29               |
| Phe166  | C <sub>δ</sub> Hs              | 5.98               | 5.93                 | 5.96               |
|         | C <sub>ε</sub> Hs              | 6.75               | 6.85                 | 7.00               |
|         | C <sub>ζ</sub> H               | 7.50               | 8.24                 | 8.05               |
| Phe167  | C <sub>δ</sub> Hs              | 8.34               | 8.16                 | 8.14               |
|         | C <sub>ε</sub> Hs              | 8.74               | 8.73                 | 8.52               |
|         | C <sub>ζ</sub> H               | 7.96               | 8.01                 | 8.82               |

a) Chemical shift, in ppm referenced to DSS via the residual solvent signals, in <sup>2</sup>H<sub>2</sub>O, 50 mM in phosphate, pH 7.1 at 30°.

b) Chemical shift in ppm, referenced to DSS, in <sup>1</sup>H<sub>2</sub>O, 50 mM in phosphate. . Data taken from Li et al.(18)
